# Supplementary material
Source: HighWire-hosted journal article supplement (https://www.rcpjournals.org/highwire/filestream/8339/field_highwire_adjunct_files/0/S1_Suggested_pathway_to_investigate_for_suspected_pulmonary.pdf)
Supplement: S1_Suggested_pathway_to_investigate_for_suspected_pulmonary.pdf [file S1_Suggested_pathway_to_investigate_for_suspected_pulmonary.pdf]

Suspected PE in patients with age  $\geq 50y$

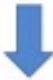

Assess pre-test probability (Wells Score)

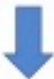

Low / Intermediate

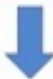

High

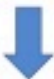

Age adjusted D-Dimer

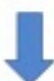

Negative

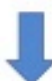

Positive

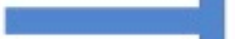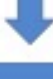

PE excluded

Imaging
